# Supplementary material
Source: PubMed Central journal article supplement (PMC4730586)
Supplement: IAI.01171-15_zii999091566so1.pdf [file IAI.01171-15_zii999091566so1.pdf]

**Table S1. Primers used for PCR amplification of tc0237, tc0412, and tc0668 genes**

| Primer Name     | Primer Sequence (5'→3')      |
|-----------------|------------------------------|
| TC023X_For-115  | CACTTAAAAGAAAAGGGGTAAATAATA  |
| TC023X_For+479  | AACCCCCTAGACTAATTTGAGG       |
| TC023X_Rev+1655 | TGTTTACAATGGGCCCTATTATCTAGG  |
| TC0412_For-75   | ATGAACCGGAGTGGATGG           |
| TC0412_Rev+1179 | TCCATAACTTCAAAAAGAGGCACAC    |
| TC0668_For-89   | CTCGTTAAAACCTTATCCTTTCCTCTCC |
| TC0668_For+410  | AGCGTTCCTTTTGACAAAAGTAT      |
| TC0668_Rev+1310 | ATGAAACGCGAAGGAGTCAAAT       |

Table S1. Primers used for PCR amplification of tc0237, tc0412, and tc0668 genes. Primers are named by their target gene, forward/reverse in relation to the ORF strand, and forward ORF position from the first base of the start codon.

**Table S2. Accessions of sequencing data deposited to public databases**

| Species                    | Strain | Population/<br>Clone | BioProject<br>Accession | BioSample<br>Accession | SRA Experiment | SRA Sample | SRA Run    | GenBank<br>Accession | Locus Tag<br>Prefix | TaxID   |
|----------------------------|--------|----------------------|-------------------------|------------------------|----------------|------------|------------|----------------------|---------------------|---------|
| <i>Chlamydia muridarum</i> | Nigg3  | G0                   | PRJNA227769             | SAMN02402710           | SRX665165      | SRS669997  | SRR1531377 | CP009760.1           | DNC                 | 1434769 |
| <i>Chlamydia muridarum</i> | Nigg3  | G13.11.1             | PRJNA227769             | SAMN03569055           | SRX1011105     | SRS923052  | SRR1999066 |                      |                     | 83560   |
| <i>Chlamydia muridarum</i> | Nigg3  | G13.32.1             | PRJNA227769             | SAMN03569056           | SRX1011110     | SRS923053  | SRR1999067 |                      |                     | 83560   |
| <i>Chlamydia muridarum</i> | Nigg3  | G28                  | PRJNA227769             | SAMN02630906           | SRX665182      | SRS670002  | SRR1531380 |                      |                     | 83560   |
| <i>Chlamydia muridarum</i> | Nigg3  | G28.51.1             | PRJNA227769             | SAMN03273902           | SRX825529      | SRS805055  | SRR1736645 |                      |                     | 83560   |
| <i>Chlamydia muridarum</i> | Nigg3  | G40                  | PRJNA227769             | SAMN03273906           | SRX825533      | SRS805058  | SRR1736650 |                      |                     | 83560   |
| <i>Chlamydia muridarum</i> | Nigg3  | G40.50.2             | PRJNA227769             | SAMN03569058           | SRX1011113     | SRS923056  | SRR1999069 |                      |                     | 83560   |

Table S2. Accessions of sequencing data deposited to public databases. 977 Unmapped passage population and clone whole-genome NGS reads were 978 uploaded to the Sequence Read Archive (SRA) under the indicated experiment, 45 979 sample, and run accessions. The representative chromosome for the Nigg3 980 parent and its annotation are available from GenBank.

**Table S3. *C. muridarum* Nigg3 plaque clone genotypes**

| <b>Nigg3 Passage</b> | <b>Clone</b> | <b>TC0412</b> | <b>TC0668</b> | <b>TC0237</b> |
|----------------------|--------------|---------------|---------------|---------------|
| G0                   | 1            | E1            | WT            | WT            |
| G0                   | 2            | G1            | WT            | WT            |
| G0                   | 3            | G1            | WT            | WT            |
| G0                   | 4            | G1            | WT            | WT            |
| G0                   | 5            | E1            | WT            | WT            |
| G0                   | 6            | B1            | WT            | WT            |
| G0                   | 7            | C1            | WT            | WT            |
| G0                   | 8            | C1            | WT            | WT            |
| G0                   | 9.1          | D2            | WT            | WT            |
| G0                   | 10           | B3            | WT            | WT            |
| G0                   | 11           | C1            | WT            | WT            |
| G0                   | 12.1         | C1            | WT            | WT            |
| G0                   | 13           | B3            | WT            | WT            |
| G0                   | 14           | C1            | WT            | WT            |
| G0                   | 15.1         | C2            | WT            | WT            |
| G0                   | 16           | B2            | WT            | WT            |
| G0                   | 17           | E1            | WT            | WT            |
| G0                   | 18           | B1            | WT            | WT            |
| G0                   | 19.1         | B1            | WT            | WT            |
| G0                   | 20           | C2            | WT            | WT            |
| G0                   | 21.3         | D1            | WT            | WT            |
| G0                   | 22           | D1            | WT            | WT            |
| G0                   | 23           | C2            | WT            | WT            |
| G0                   | 24           | E1            | WT            | WT            |
| G0                   | 25           | F1            | WT            | WT            |
| G0                   | 26           | C1            | WT            | WT            |
| G0                   | 27           | C2            | WT            | WT            |
| G0                   | 28           | B3            | WT            | WT            |
| G0                   | 29           | D2            | WT            | WT            |

|     |    |    |       |    |
|-----|----|----|-------|----|
| G0  | 30 | B3 | WT    | WT |
| G0  | 31 | B3 | WT    | WT |
| G0  | 32 | C2 | WT    | WT |
| G0  | 33 | E1 | WT    | WT |
| G0  | 34 | C2 | WT    | WT |
| G0  | 35 | C2 | WT    | WT |
| G0  | 36 | F1 | WT    | WT |
| G0  | 37 | D1 | WT    | WT |
| G0  | 38 | B1 | WT    | WT |
| G0  | 39 | E1 | WT    | WT |
| G0  | 40 | B1 | WT    | WT |
| G0  | 41 | B1 | WT    | WT |
| G0  | 42 | B3 | WT    | WT |
| G0  | 43 | B3 | WT    | WT |
| G0  | 44 | F1 | WT    | WT |
| G0  | 45 | B2 | WT    | WT |
| G0  | 46 | C2 | WT    | WT |
| G0  | 47 | B1 | WT    | WT |
| G0  | 48 | C2 | WT    | WT |
| G0  | 49 | B3 | WT    | WT |
| G0  | 50 | B3 | WT    | WT |
| G13 | 1  | D1 | G322R | WT |
| G13 | 2  | D1 | G322R | WT |
| G13 | 3  | D1 | WT    | WT |
| G13 | 4  | B3 | WT    | WT |
| G13 | 5  | D1 | G322R | WT |
| G13 | 6  | D1 | G322R | WT |
| G13 | 7  | D1 | G322R | WT |
| G13 | 8  | nd | WT    | WT |
| G13 | 9  | D1 | G322R | WT |
| G13 | 10 | D1 | G322R | WT |
| G13 | 11 | B2 | G216* | WT |
| G13 | 12 | D1 | G322R | WT |
| G13 | 13 | B2 | G216* | WT |
| G13 | 14 | D1 | G322R | WT |
| G13 | 15 | D2 | WT    | WT |
| G13 | 16 | B2 | G216* | WT |
| G13 | 17 | B3 | WT    | WT |
| G13 | 18 | D1 | G322R | WT |
| G13 | 19 | B2 | G216* | WT |
| G13 | 20 | D1 | G322R | WT |
| G13 | 21 | D1 | G322R | WT |
| G13 | 22 | B2 | nd    | WT |
| G13 | 23 | B2 | G216* | WT |
| G13 | 24 | D1 | G322R | WT |
| G13 | 25 | nd | nd    | nd |
| G13 | 26 | nd | nd    | nd |
| G13 | 27 | D1 | G322R | WT |
| G13 | 28 | B2 | G216* | WT |
| G13 | 29 | C2 | WT    | WT |
| G13 | 30 | D1 | G322R | WT |

|     |    |    |       |       |
|-----|----|----|-------|-------|
| G13 | 31 | D1 | G322R | WT    |
| G13 | 32 | B2 | WT    | WT    |
| G13 | 33 | B2 | G216* | WT    |
| G13 | 34 | B3 | WT    | WT    |
| G13 | 35 | D1 | G322R | WT    |
| G13 | 36 | D1 | G322R | WT    |
| G13 | 37 | B2 | G216* | WT    |
| G13 | 38 | D1 | G322R | WT    |
| G13 | 39 | B3 | WT    | WT    |
| G13 | 40 | B2 | G216* | WT    |
| G13 | 41 | D1 | G322R | WT    |
| G13 | 42 | B2 | G216* | WT    |
| G13 | 43 | D1 | G322R | WT    |
| G13 | 44 | D1 | G322R | WT    |
| G13 | 45 | B3 | WT    | WT    |
| G13 | 46 | D1 | G322R | WT    |
| G13 | 47 | B3 | WT    | WT    |
| G13 | 48 | B2 | G216* | WT    |
| G13 | 49 | B4 | WT    | WT    |
| G13 | 50 | D1 | G322R | WT    |
| G13 | 51 | B2 | G216* | WT    |
| G13 | 52 | C2 | WT    | WT    |
| G13 | 53 | B2 | G216* | WT    |
| G13 | 54 | D1 | G322R | WT    |
| G13 | 55 | D1 | G322R | WT    |
| G13 | 56 | D1 | G322R | WT    |
| G13 | 57 | B2 | G322R | WT    |
| G13 | 58 | B2 | G216* | WT    |
| G13 | 59 | B3 | G322R | WT    |
| G13 | 60 | D1 | G322R | WT    |
| G13 | 61 | C2 | WT    | WT    |
| G13 | 62 | D1 | G322R | WT    |
| G13 | 63 | B2 | G216* | WT    |
| G13 | 64 | D1 | G322R | WT    |
| G13 | 65 | D1 | G322R | WT    |
| G13 | 66 | B2 | G216* | WT    |
| G13 | 67 | D1 | G322R | WT    |
| G13 | 68 | C2 | WT    | WT    |
| G13 | 69 | D1 | G322R | WT    |
| G13 | 70 | B2 | G216* | WT    |
| G13 | 71 | C2 | G216* | WT    |
| G13 | 72 | B2 | G216* | WT    |
| G13 | 73 | B2 | G216* | WT    |
| G13 | 74 | D1 | G322R | WT    |
| G13 | 75 | D1 | G322R | WT    |
| G13 | 76 | C2 | nd    | WT    |
| G13 | 77 | D1 | G322R | WT    |
| G13 | 78 | D1 | G322R | WT    |
| G13 | 79 | nd | G322R | WT    |
| G13 | 80 | B3 | WT    | Q117E |
| G13 | 81 | D1 | G322R | WT    |

|     |    |    |       |       |
|-----|----|----|-------|-------|
| G13 | 82 | E1 | G216* | WT    |
| G13 | 83 | B2 | G216* | WT    |
| G13 | 84 | D1 | G322R | WT    |
| G13 | 85 | B2 | G216* | WT    |
| G13 | 86 | D1 | nd    | WT    |
| G13 | 87 | B2 | G216* | WT    |
| G13 | 88 | D1 | G322R | WT    |
| G13 | 89 | D1 | G322R | WT    |
| G13 | 90 | B2 | G216* | WT    |
| G13 | 91 | D1 | G322R | WT    |
| G13 | 92 | D1 | G322R | WT    |
| G13 | 93 | D1 | G322R | WT    |
| G13 | 94 | B2 | G216* | WT    |
| G13 | 95 | D1 | G322R | WT    |
| G13 | 96 | B2 | G216* | WT    |
| G16 | 1  | B3 | WT    | Q117E |
| G16 | 2  | B3 | WT    | Q117E |
| G16 | 3  | B3 | WT    | Q117E |
| G16 | 4  | B3 | WT    | Q117E |
| G16 | 5  | B2 | G216* | WT    |
| G16 | 6  | B3 | WT    | Q117E |
| G16 | 7  | B3 | WT    | Q117E |
| G16 | 8  | B3 | WT    | Q117E |
| G16 | 9  | B3 | WT    | Q117E |
| G16 | 10 | B3 | WT    | Q117E |
| G16 | 11 | B3 | WT    | Q117E |
| G16 | 12 | C1 | WT    | Q117E |
| G16 | 13 | B3 | WT    | Q117E |
| G16 | 14 | B3 | WT    | Q117E |
| G16 | 15 | B3 | WT    | Q117E |
| G16 | 16 | B3 | WT    | Q117E |
| G16 | 17 | B3 | WT    | Q117E |
| G16 | 18 | B3 | WT    | Q117E |
| G16 | 19 | B3 | WT    | Q117E |
| G16 | 20 | B3 | WT    | Q117E |
| G16 | 21 | B3 | WT    | Q117E |
| G16 | 22 | B3 | WT    | Q117E |
| G16 | 23 | B3 | WT    | Q117E |
| G16 | 24 | B3 | WT    | Q117E |
| G16 | 25 | E1 | WT    | Q117E |
| G16 | 26 | B2 | G216* | WT    |
| G16 | 27 | B3 | WT    | Q117E |
| G16 | 28 | B3 | WT    | nd    |
| G16 | 29 | nd | G216* | nd    |
| G16 | 30 | B3 | WT    | Q117E |
| G16 | 31 | D1 | G322R | WT    |
| G16 | 32 | B3 | WT    | Q117E |
| G16 | 33 | B3 | WT    | Q117E |
| G16 | 34 | E1 | WT    | Q117E |
| G16 | 35 | B3 | WT    | Q117E |
| G16 | 36 | B3 | WT    | Q117E |

|     |    |    |       |       |
|-----|----|----|-------|-------|
| G16 | 37 | B3 | WT    | Q117E |
| G16 | 38 | D1 | G322R | WT    |
| G16 | 39 | B3 | WT    | Q117E |
| G16 | 40 | nd | WT    | Q117E |
| G16 | 41 | B3 | WT    | Q117E |
| G16 | 42 | B3 | WT    | Q117E |
| G16 | 43 | D1 | G322R | WT    |
| G16 | 44 | B3 | WT    | Q117E |
| G16 | 45 | nd | WT    | Q117E |
| G16 | 46 | B3 | WT    | Q117E |
| G16 | 47 | B3 | WT    | Q117E |
| G16 | 48 | B3 | WT    | Q117E |
| G16 | 49 | B3 | WT    | Q117E |
| G16 | 50 | D1 | G322R | WT    |
| G16 | 51 | B3 | G216* | WT    |
| G16 | 52 | B3 | WT    | Q117E |
| G16 | 53 | B3 | WT    | nd    |
| G16 | 54 | D1 | G322R | WT    |
| G16 | 55 | B3 | WT    | Q117E |
| G16 | 56 | B3 | WT    | Q117E |
| G16 | 57 | B3 | WT    | Q117E |
| G16 | 58 | B3 | WT    | Q117E |
| G16 | 59 | D1 | G322R | WT    |
| G16 | 60 | B2 | G216* | WT    |
| G16 | 61 | B3 | WT    | Q117E |
| G16 | 62 | B3 | WT    | Q117E |
| G16 | 63 | D1 | G322R | WT    |
| G16 | 64 | B3 | WT    | Q117E |
| G16 | 65 | B3 | WT    | Q117E |
| G16 | 66 | B3 | WT    | Q117E |
| G16 | 67 | B3 | WT    | Q117E |
| G16 | 68 | B3 | WT    | Q117E |
| G16 | 69 | B3 | WT    | Q117E |
| G16 | 70 | nd | WT    | Q117E |
| G16 | 71 | B3 | WT    | Q117E |
| G16 | 72 | B3 | WT    | Q117E |
| G16 | 73 | B3 | WT    | Q117E |
| G16 | 74 | D1 | G322R | WT    |
| G16 | 75 | B3 | WT    | Q117E |
| G16 | 76 | nd | WT    | Q117E |
| G16 | 77 | B3 | WT    | Q117E |
| G16 | 78 | D1 | G322R | WT    |
| G16 | 79 | B3 | WT    | Q117E |
| G16 | 80 | B3 | WT    | Q117E |
| G16 | 81 | B3 | WT    | Q117E |
| G16 | 82 | B3 | WT    | nd    |
| G16 | 83 | D1 | G322R | WT    |
| G16 | 84 | D1 | G322R | WT    |
| G16 | 85 | B3 | WT    | Q117E |
| G16 | 86 | B3 | WT    | Q117E |
| G16 | 87 | B3 | WT    | Q117E |

|     |      |    |       |       |
|-----|------|----|-------|-------|
| G16 | 88   | B3 | WT    | Q117E |
| G16 | 89   | B3 | WT    | Q117E |
| G16 | 90   | B3 | WT    | Q117E |
| G16 | 91   | B3 | WT    | Q117E |
| G16 | 92   | B3 | WT    | Q117E |
| G16 | 93   | B3 | WT    | nd    |
| G16 | 94   | B3 | WT    | nd    |
| G16 | 95   | nd | WT    | nd    |
| G16 | 96   | nd | WT    | nd    |
| G28 | 1.2  | D1 | G322R | Q117E |
| G28 | 2    | B2 | WT    | Q117E |
| G28 | 3    | B3 | WT    | Q117E |
| G28 | 4    | D1 | G322R | Q117E |
| G28 | 5    | B3 | WT    | Q117E |
| G28 | 6    | B3 | WT    | Q117E |
| G28 | 7    | B3 | WT    | Q117E |
| G28 | 8    | D1 | G322R | Q117E |
| G28 | 9    | E1 | WT    | Q117E |
| G28 | 10.2 | B3 | WT    | Q117E |
| G28 | 11   | B3 | WT    | Q117E |
| G28 | 12.3 | D1 | G322R | Q117E |
| G28 | 13.2 | B3 | WT    | Q117E |
| G28 | 14   | D1 | G322R | Q117E |
| G28 | 15.1 | D1 | G322R | Q117E |
| G28 | 16.1 | E1 | WT    | Q117E |
| G28 | 17.1 | D1 | G322R | Q117E |
| G28 | 18.1 | C1 | WT    | Q117E |
| G28 | 19.1 | B3 | WT    | Q117E |
| G28 | 20.1 | B3 | WT    | Q117E |
| G28 | 21.1 | B3 | WT    | Q117E |
| G28 | 22.1 | B3 | WT    | Q117E |
| G28 | 23.1 | B3 | WT    | Q117E |
| G28 | 24   | nd | nd    | nd    |
| G28 | 25   | D1 | G322R | Q117E |
| G28 | 26   | nd | nd    | nd    |
| G28 | 27   | nd | nd    | nd    |
| G28 | 28   | nd | nd    | nd    |
| G28 | 29   | nd | nd    | nd    |
| G28 | 30   | B3 | WT    | Q117E |
| G28 | 31.1 | E1 | WT    | Q117E |
| G28 | 32   | nd | nd    | nd    |
| G28 | 33.1 | D1 | G322R | Q117E |
| G28 | 34.1 | B3 | WT    | Q117E |
| G28 | 35.1 | E1 | WT    | Q117E |
| G28 | 36   | nd | nd    | nd    |
| G28 | 37   | nd | nd    | nd    |
| G28 | 38   | E1 | WT    | Q117E |
| G28 | 39   | B2 | G322R | Q117E |
| G28 | 40   | C1 | WT    | Q117E |
| G28 | 41   | D1 | G322R | Q117E |
| G28 | 42   | B3 | WT    | Q117E |

|     |    |    |       |       |
|-----|----|----|-------|-------|
| G28 | 43 | E1 | WT    | Q117E |
| G28 | 44 | D1 | G322R | Q117E |
| G28 | 45 | B3 | WT    | Q117E |
| G28 | 46 | D1 | G322R | Q117E |
| G28 | 47 | nd | nd    | nd    |
| G28 | 48 | B3 | G322R | Q117E |
| G28 | 49 | B3 | WT    | Q117E |
| G28 | 50 | nd | nd    | nd    |
| G28 | 51 | B2 | G216* | Q117E |
| G28 | 52 | D1 | G322R | Q117E |
| G28 | 53 | B3 | WT    | Q117E |
| G28 | 54 | B3 | G322R | Q117E |
| G28 | 55 | D1 | G322R | Q117E |
| G28 | 56 | B3 | WT    | Q117E |
| G28 | 57 | B3 | G322R | Q117E |
| G28 | 58 | B3 | WT    | Q117E |
| G28 | 59 | B3 | G322R | Q117E |
| G28 | 60 | B3 | WT    | Q117E |
| G28 | 61 | nd | nd    | nd    |
| G28 | 62 | B3 | WT    | Q117E |
| G28 | 63 | D1 | G322R | Q117E |
| G28 | 64 | D1 | G322R | Q117E |
| G28 | 65 | B3 | WT    | Q117E |
| G28 | 66 | E1 | WT    | Q117E |
| G28 | 67 | D1 | G322R | Q117E |
| G40 | 1  | nd | nd    | nd    |
| G40 | 2  | E1 | WT    | Q117E |
| G40 | 3  | E1 | WT    | Q117E |
| G40 | 4  | B2 | G216* | Q117E |
| G40 | 5  | E1 | WT    | Q117E |
| G40 | 6  | D1 | G322R | Q117E |
| G40 | 7  | E1 | WT    | Q117E |
| G40 | 8  | E1 | WT    | Q117E |
| G40 | 9  | D1 | G322R | Q117E |
| G40 | 10 | E1 | WT    | Q117E |
| G40 | 11 | D1 | G322R | Q117E |
| G40 | 12 | B3 | WT    | Q117E |
| G40 | 13 | D1 | G322R | Q117E |
| G40 | 14 | E1 | WT    | Q117E |
| G40 | 15 | D1 | G322R | Q117E |
| G40 | 16 | D1 | G322R | Q117E |
| G40 | 17 | B3 | G322R | Q117E |
| G40 | 18 | E1 | WT    | Q117E |
| G40 | 19 | D1 | WT    | Q117E |
| G40 | 20 | E1 | WT    | Q117E |
| G40 | 21 | C1 | WT    | Q117E |
| G40 | 22 | D1 | WT    | Q117E |
| G40 | 23 | nd | nd    | nd    |
| G40 | 24 | D1 | G322R | Q117E |
| G40 | 25 | D1 | G322R | Q117E |
| G40 | 26 | E1 | WT    | Q117E |



|     |    |    |       |       |
|-----|----|----|-------|-------|
| G40 | 27 | D1 | G322R | Q117E |
| G40 | 28 | B2 | G216* | Q117E |
| G40 | 29 | B2 | G216* | Q117E |
| G40 | 30 | E1 | WT    | Q117E |
| G40 | 31 | B3 | G216* | Q117E |
| G40 | 32 | B3 | G322R | Q117E |
| G40 | 33 | D1 | G322R | Q117E |
| G40 | 34 | E1 | WT    | Q117E |
| G40 | 35 | D1 | G322R | Q117E |
| G40 | 36 | nd | nd    | nd    |
| G40 | 37 | D1 | G322R | Q117E |
| G40 | 38 | E1 | WT    | Q117E |
| G40 | 39 | E1 | WT    | Q117E |
| G40 | 40 | E1 | WT    | Q117E |
| G40 | 41 | E1 | WT    | Q117E |
| G40 | 42 | E1 | WT    | Q117E |
| G40 | 43 | D1 | G322R | Q117E |
| G40 | 44 | D1 | G322R | Q117E |
| G40 | 45 | D1 | G322R | Q117E |
| G40 | 46 | D1 | G322R | Q117E |
| G40 | 47 | E1 | G322R | Q117E |
| G40 | 48 | B2 | G216* | Q117E |
| G40 | 49 | E1 | WT    | Q117E |
| G40 | 50 | B2 | WT    | Q117E |
| G40 | 51 | C1 | WT    | Q117E |
| G40 | 52 | D1 | G322R | Q117E |
| G40 | 53 | C1 | WT    | Q117E |

Table S3. *C. muridarum* Nigg3 plaque clone genotypes. Genotypes were determined by Sanger sequencing of tc0412, tc0668, and tc0237 PCR amplicons. tc0412 genotypes are expressed as proteoforms (Table 2), while tc0668 and tc0237 genotypes are expressed as protein variants. Sanger sequence reads with inadequate quality to make a genotype call are noted by “nd” for “no data.”
